# Supplementary material
Source: publisher figshare collection journal article supplement (https://wiley.figshare.com/articles/dataset/_/3531290)
Supplement: Supplementary file 1 [file 1]

***Ecological Archives* E090-115-A5**

**Abhyudai Singh, William W. Murdoch, and Roger M. Nisbet. 2009. Skewed attacks, stability, and host suppression. *Ecology* 90:1679–1686.**

### Appendix E: Stability analysis when risk is inverse gaussian distributed

In the case when the distribution of risk is an inverse gaussian distribution with mean  $c$  and coefficient of variation  $CV$ , we have (Chhikara and Folks 1989)

$$f(P_t) = \int_{x=0}^{\infty} p(x) \exp(-xP_t) dx = \exp\left(\frac{1}{CV^2} \left(1 - \sqrt{1 + 2cCV^2P_t}\right)\right). \quad (\text{E.1})$$

Thus the discrete-time model

$$H_{t+1} = RH_t \int_{x=0}^{\infty} p(x) \exp(-xP_t) dx \quad (\text{E.2})$$

$$P_{t+1} = k(RH_t - H_{t+1}) \quad (\text{E.3})$$

becomes

$$H_{t+1} = RH_t \exp\left(\frac{1}{CV^2} \left(1 - \sqrt{1 + 2cCV^2P_t}\right)\right) \quad (\text{E.4})$$

$$P_{t+1} = k(RH_t - H_{t+1}). \quad (\text{E.5})$$

The equilibrium of this model is given as<sup>1</sup>

$$H^* = \frac{.5CV^2(\log(R))^2 + \log(R)}{kc(R-1)}, \quad P^* = \frac{.5CV^2(\log(R))^2 + \log(R)}{c}. \quad (\text{E.6})$$

Using the stability condition (equation (B.22) in Appendix B) we have that the above equilibrium is stable, if and only if,

$$\frac{.5CV^2(\log(R))^2 + \log(R)}{CV^2 \log(R) + 1} < \frac{R-1}{R}. \quad (\text{E.7})$$

With  $CV = 1.31$  for the distribution of risk in Figure 2, we calculate from the above inequality that the host-parasitoid equilibrium is stable for  $1 < R < 2$  and unstable for  $R > 2$ . One can also see that if  $R$  is chosen larger than 4.92 then inequality (E.7) can never hold for any value of  $CV^2$ . Hence in this case even infinite amount of  $CV$  will not stabilize the equilibrium.

---

<sup>1</sup> $\log(x)$  denotes the natural logarithm of  $x$ .

## **REFERENCES**

Chhikara, R. S., and J. L. Folks, 1989. The inverse gaussian distribution: theory, methodology, and applications. Marcel Dekker, New York.
