# Supplementary material
Source: publisher figshare collection journal article supplement (https://wiley.figshare.com/articles/dataset/_/3531290)
Supplement: Supplementary file 2 [file 1 › appendix-E.htm]

Ecological Archives E090-115-A5


### *Ecological Archives* E090-115-A5

### **Abhyudai Singh, William W. Murdoch, and Roger M. Nisbet. 2009. Skewed attacks, stability, and host suppression. *Ecology* 90:1679–1686.**

Appendix E. Stability analysis when risk is inverse Gaussian distributed. Click here for a PDF file of the appendix.


---


[Back to E090-115]
